# Supplementary material
Source: MDPI journal article supplement (https://www.mdpi.com/2075-163X/12/7/848)
Supplement: s1 [file s1]

Review

# Supplementary Materials: Evolution of Sulfidic Legacy Mine Tailings: A Review of the Wheal Maid Site, UK

Verity Fitch, Anita Parbhakar-Fox\*, Richard Crane and Laura Newsome

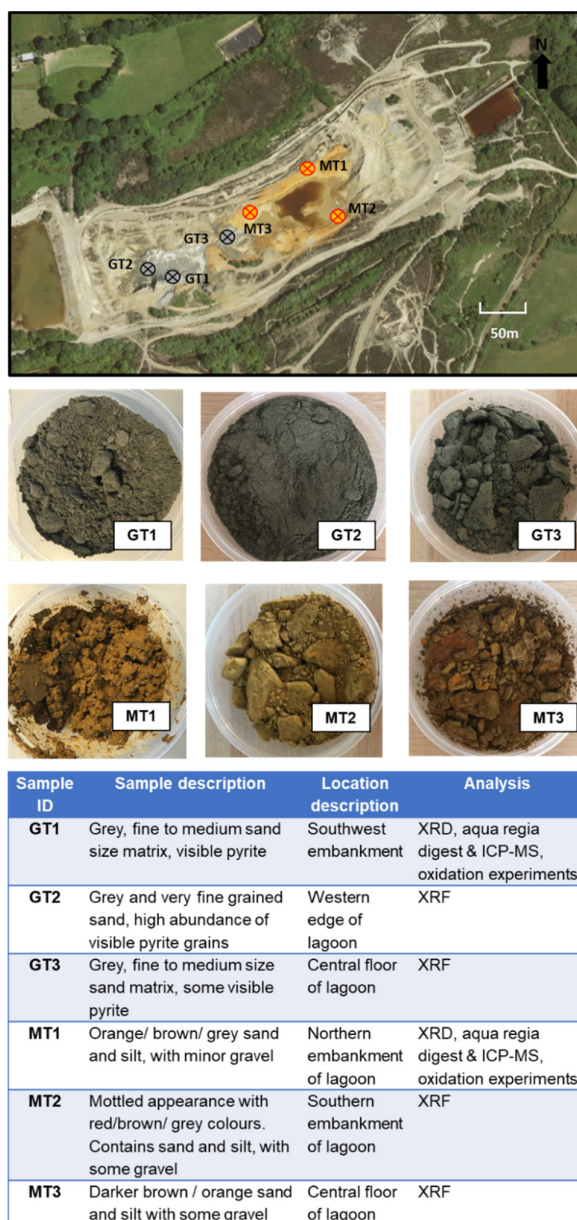

**Figure S1.** Sample location map for 2019 experiments, modified from: Crown copyright and database rights 2019 Ordnance Survey (Digimap licence); sample photographs; and descriptions of waste samples collected and the analyses performed.

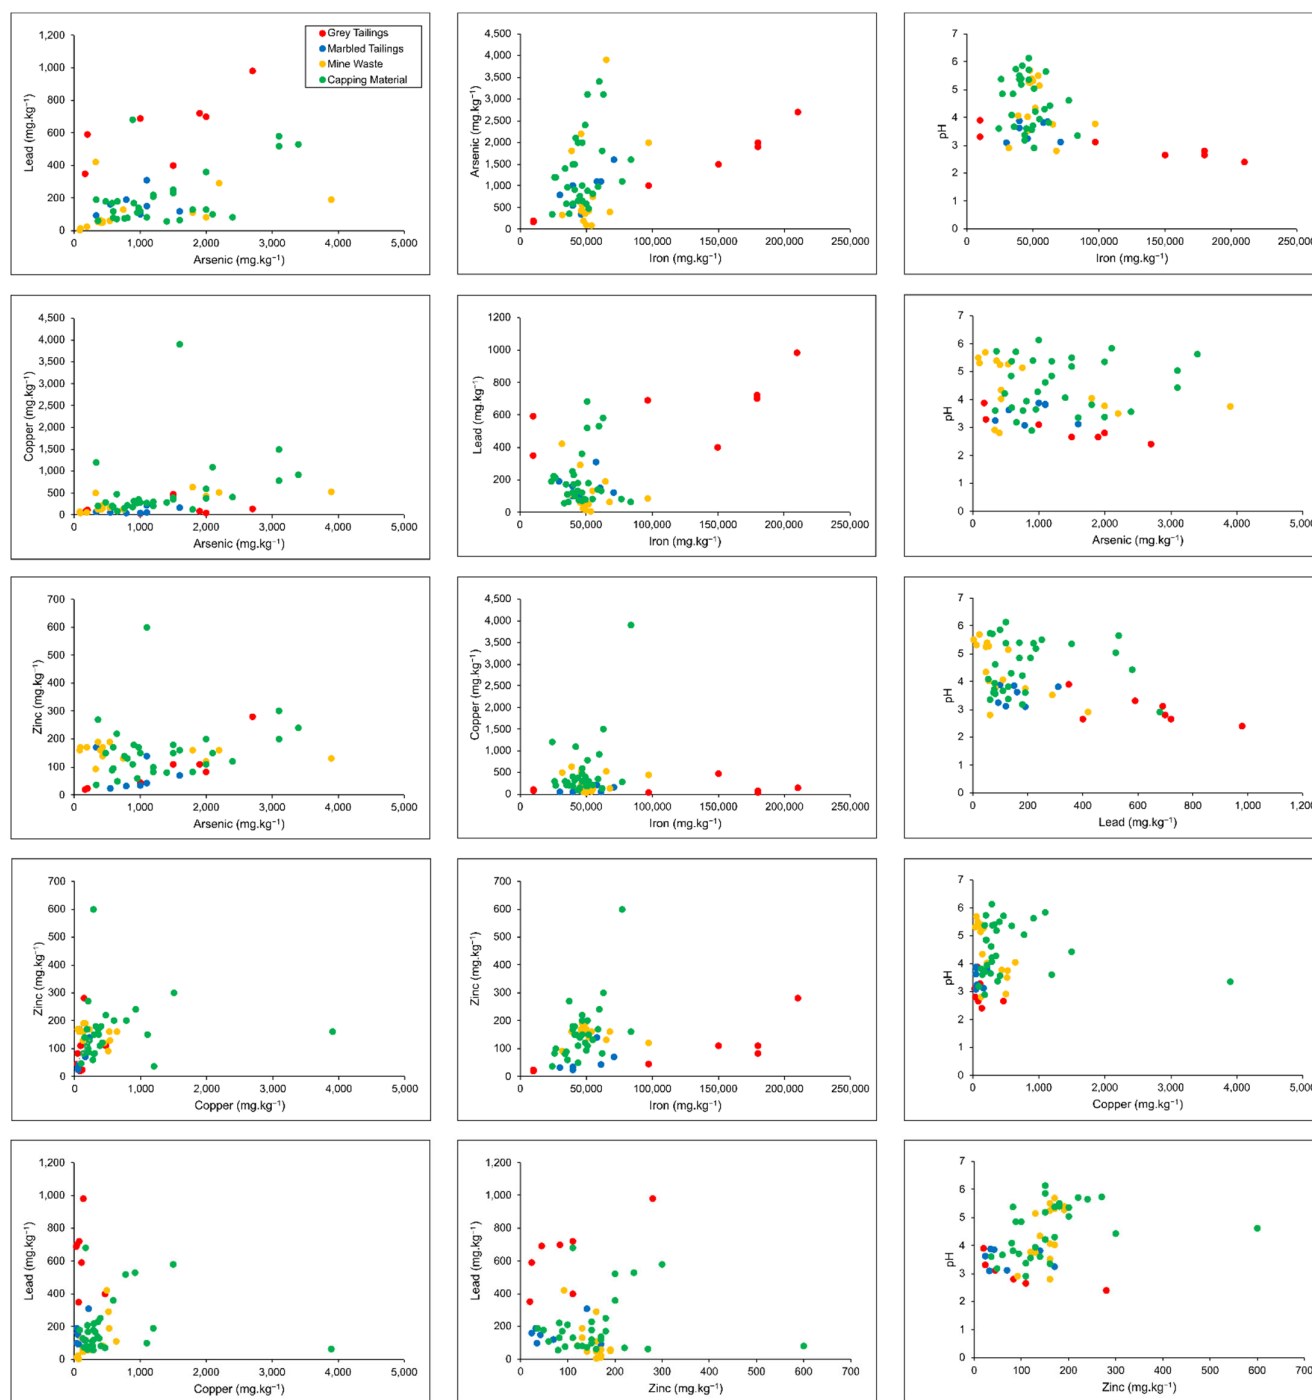

**Figure S2.** Correlation plots for concentrations of metals and pH in Wheal Maid waste samples (figure drawn from data collected by URS [1]).

**Table S1.** A list of the 26 significant pollutant linkages (SPLs), modified from [2].

| <b>SPL Number</b> | <b>Significant Pollutant</b>   | <b>Migration and Exposure Pathway</b>                          | <b>Receptor</b>                                        |
|-------------------|--------------------------------|----------------------------------------------------------------|--------------------------------------------------------|
| 1–2               | As                             | Ingestion, dermal contact and inhalation of contaminated soils | Site users – child mountain bikers                     |
| 3–10              | As, Cd, Cr, Cu, Fe, Pb, Ni, Zn | Leaching from contaminated soils through the lower dam         | Controlled waters – St Day stream                      |
| 11–18             | As, Cd, Cr, Cu, Fe, Pb, Ni, Zn | Leaching from contaminated soils through culvert walls         | Controlled waters – St Day stream                      |
| 19–26             | As, Cd, Cr, Cu, Fe, Pb, Ni, Zn | Leaching from contaminated soils                               | Controlled waters – groundwater into the minor aquifer |

**Table S2.** Interviews conducted with organisations and individuals with links to Wheal Maid. Interviewees were asked about their involvement with the site and to supply any documents to help develop a better understanding of the site.

| Date       | Contact                 | Role                                                       | Discussed                                  | Outcome                                                                               |
|------------|-------------------------|------------------------------------------------------------|--------------------------------------------|---------------------------------------------------------------------------------------|
| 05/06/2019 | Kim Moreton             | Lecturer                                                   | SLEM projects on the area                  | Provided information on previous students work                                        |
| 10/06/2019 | Fiona Barnard           | Parish Clerk                                               | Parish involvement with the site           | Given me an email for the Chair                                                       |
| 10/06/2019 | Maria Walford           | Groundwater and Contaminated Land Team, Environment Agency | EA involvement with the site               | Provided reports on the site                                                          |
| 10/06/2019 | Cornwall County Council | Government Body                                            | Council involvement with site              | Received an email back from Stephen Whitehurst                                        |
| 10/06/2019 | Neil Wood               | Lecturer                                                   | Any geophysical data on the site           | Provided some ERT data                                                                |
| 10/06/2019 | Ben Williamson          | Lecturer                                                   | Past projects                              | Sent another students masters project                                                 |
| 10/06/2019 | Wheal Jane Group        | Previous Owners of the site                                | Any info they may have                     | Received an email back from Bernard Ballard                                           |
| 11/06/2019 | Jessica Nicholls        | CSM Alumni                                                 | Requested a copy of her dissertation       | Received a copy of her dissertation                                                   |
| 11/06/2019 | Stephen Whitehurst      | Environmental Protection Officer - Cornwall Council        | Requested any reports                      | Discussed the reports done by URS                                                     |
| 13/06/2019 | Kevin Furnish           | Chair of Parish Council                                    | Requested any studies on the site          | Informed of inspections carried out on the dams and the culvert                       |
| 19/06/2019 | Bernard Ballard         | Director at Wheal Jane                                     | Processing of Wheal Jane and Mt Wellington | Put in contact with Clifford Rice                                                     |
| 27/06/2019 | Clifford Rice           | Wheal Jane Laboratory Director                             | Processing of Wheal Jane and Mt Wellington | Arranged a meeting to show him the tailings sampled                                   |
| 03/08/2019 | Richard Freeborn        | Managing Director of Mount Wellington Mine Ltd             | Processing at Mt Wellington                | Sent over some drawings of the processing plant at Mt Wellington                      |
| 07/08/2019 | Mark Owen               | Former Geologist at Wheal Jane                             | Processing at Wheal Jane                   | Explained the technique used and information on the mineral lode                      |
| 14/08/2019 | Lexi King               | BSc Honours Student at the University of Tasmania          | Asked about her project                    | Mentioned the names of similar tailings deposits that have undergone little oxidation |
| 16/08/2019 | Mike Hallewell          | Plant Manager at Wheal Jane                                | Processing at Wheal Jane                   | Advised on the flowsheet that was used                                                |
| 09/08/2019 | Anita Parbhakar-Fox     | Senior Research Fellow at Queensland University            | Her involvement with Wheal Maid            | Sent over LA-ICP-MS work carried out on pyrite grains                                 |

**Table S3.** A list of the different simulated environments to test oxidation. GT refers to Grey Tailings, MT refers to Marbled Tailings.

| Flask | Contents of flask                                                    | Factor     |
|-------|----------------------------------------------------------------------|------------|
| ABC   | 5g GT1 + 50ml synthetic rain (shaken)                                | Physical   |
| DEF   | 5g MT1 + 50ml synthetic rain (shaken)                                | Physical   |
| G     | 5g GT1 + 50ml synthetic rain (not shaken)                            | Physical   |
| H     | 5g MT1 + 50ml synthetic rain (not shaken)                            | Physical   |
| IJK   | 5g GT1 + 50ml synthetic rain + 0.1M HNO <sub>3</sub>                 | Chemical   |
| LMN   | 5g MT1 + 50ml synthetic rain + 0.1M HNO <sub>3</sub>                 | Chemical   |
| OPQ   | 5g GT1 + 50ml synthetic rain + <i>A. ferrooxidans</i> + nutrients    | Biological |
| RST   | 5g MT1 + 50ml synthetic rain + <i>A. ferrooxidans</i> + nutrients    | Biological |
| U     | 5g GT1 + 50ml synthetic rain + <i>A. ferrooxidans</i> (no nutrients) | Biological |
| V     | 5g MT1 + 50ml synthetic rain + <i>A. ferrooxidans</i> (no nutrients) | Biological |
| W     | 5g GT1 + 50ml synthetic rain + nutrients (no cells)                  | Biological |
| X     | 5g MT1 + 50ml synthetic rain + nutrients (no cells)                  | Biological |
| Y     | 50ml synthetic rain + 0.1M HNO <sub>3</sub> (control for glassware)  | Biological |
